# Supplementary material for: Kinetic results for mutations of conserved residues H304 and R309 of human sulfite oxidase point to mechanistic complexities
Source: Royal Society of Chemistry journal article supplement (doi:10.1039/c4mt00099d), 2014-01-01

## Supporting Information

### **Kinetic Results for Mutations of Conserved Residues H304 and R309 of Human Sulfite Oxidase Point to Mechanistic Complexities**

*Amanda C. Davis,<sup>1</sup> Kayunta Johnson-Winters,<sup>2\*</sup> Anna R. Arnold,<sup>1</sup> Gordon Tollin,<sup>1</sup> John H.*

*Enemark<sup>1</sup>*

<sup>1</sup>Department of Chemistry and Biochemistry, University of Arizona, Tucson, Arizona, 85721-0041

<sup>2</sup>Department of Chemistry and Biochemistry, University of Texas at Arlington, Arlington, Texas 76019-0065

*\*Kayunta@uta.edu*

**Table S1:** Forward and reverse primers for the H304 and R309 hSO mutants. Wt hSO was used as the template.

| <b>Mutant</b>              | <b>Primer</b>      | <b>Primer Sequence</b>                                                                                                             |
|----------------------------|--------------------|------------------------------------------------------------------------------------------------------------------------------------|
| H304A<br>H304A             | forward<br>reverse | ctgccacgtgac <b>gcc</b> ggcttcctgtg<br>cacaggggaagcc <b>ggc</b> gtcacgtggcag                                                       |
| H304F<br>H304F             | forward<br>reverse | ctgccacgtgact <b>ttc</b> ggcttcctgtg<br>cacaggggaagcc <b>gaag</b> tcacgtggcag                                                      |
| H304E<br>H304E             | forward<br>reverse | ctgccacgtgac <b>gag</b> ggcttcctgtg<br>cacaggggaagcc <b>ctc</b> gtcacgtggcag                                                       |
| H304R<br>H304R             | forward<br>reverse | ctgccacgtgac <b>ggc</b> ggcttcctgtg<br>cacaggggaagcc <b>ggc</b> gtcacgtggcag                                                       |
| H304R/R309H<br>H304R/R309H | forward<br>reverse | ctgccacgtgac <b>ggc</b> ggcttcctgtg <b>cat</b> gtggtggttcctgga<br>tccaggaaccaccac <b>atg</b> cacaggggaagcc <b>ggc</b> gtcacgtggcag |
| R309H<br>R309H             | forward<br>reverse | tccctgtg <b>cat</b> gtggtggtt<br>aaccaccac <b>atg</b> cacagggaa                                                                    |
| R309K<br>R309K             | forward<br>reverse | tccctgtg <b>aaag</b> tggtggtt<br>aaccaccac <b>ttt</b> cacagggaa                                                                    |
| R309E<br>R309E             | forward<br>reverse | tccctgtg <b>gaag</b> tggtggtt<br>aaccaccac <b>ttc</b> cacagggaa                                                                    |
| R309M<br>R309M             | forward<br>reverse | tccctgtg <b>atg</b> tggtggtt<br>aaccaccac <b>cat</b> cacagggaa                                                                     |

**Table S2:** Molybdenum to iron ratios as determined by inductively coupled plasma.

| <b>hSO mutant</b> | <b>Mo/Fe</b> |
|-------------------|--------------|
| H304A             | N/A          |
| H304F             | 0.58         |
| H304E             | 0.62         |
| H304R             | 0.60         |
| H304R/R309H       | 0.63         |
| R309H             | 0.83         |
| R309K             | 0.73         |
| R309E             | N/A          |
| R309M             | 0.80         |

**Table S3: Comparison of  $k_{\text{cat}}$ ,  $k_{\text{turnover}}$  and  $k_{\text{et}}$  for wt and H304 and R309 mutants**

| hSO         | $k_{\text{cat}}$ (s <sup>-1</sup> ) pH 7.6 | $k_{\text{turnover}}$ (s <sup>-1</sup> ) <sup>a</sup> | $k_{\text{et}}$ (s <sup>-1</sup> ) | $k_{\text{et}}$ pH |
|-------------|--------------------------------------------|-------------------------------------------------------|------------------------------------|--------------------|
| wt          | 27                                         | 13.5                                                  | 310 (220)                          | 7.4 (7.6)          |
| H304A       | 60                                         | 30                                                    | 110                                | 7.4                |
| H304F       | 95                                         | 47.5                                                  | 120                                | 7.4                |
| H304E       | 60                                         | 30                                                    | 205                                | 7.4                |
| H304R       | 110                                        | 55                                                    | 210                                | 7.4                |
| H304R/R309H | 100                                        | 50                                                    | 105                                | 7.4                |
| R309H       | 90                                         | 45                                                    | 100                                | 7.6                |
| R309K       | 90                                         | 45                                                    | 130                                | 7.6                |
| R309E       | 126                                        | 63                                                    | 67                                 | 7.6                |
| R309M       | 105                                        | 52.5                                                  | 90                                 | 7.6                |

<sup>a</sup>  $k_{\text{turnover}} = \frac{1}{2} k_{\text{cat}}$

## Steady State Kinetics

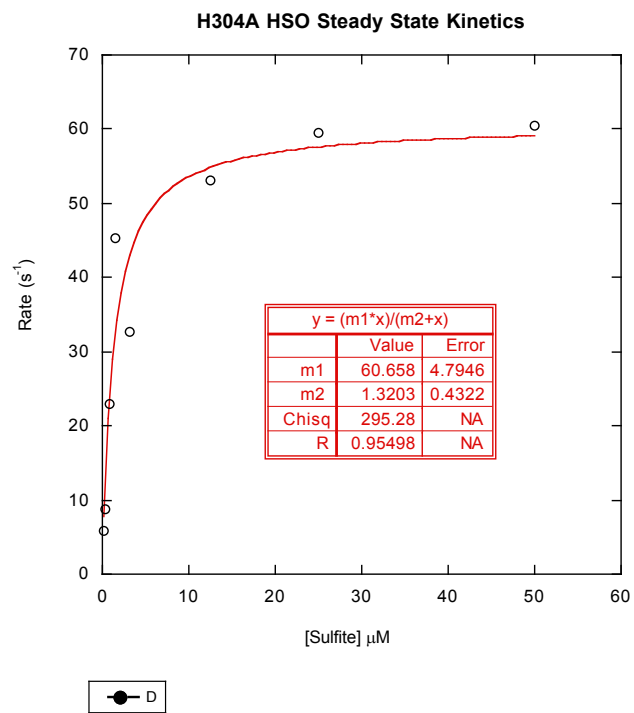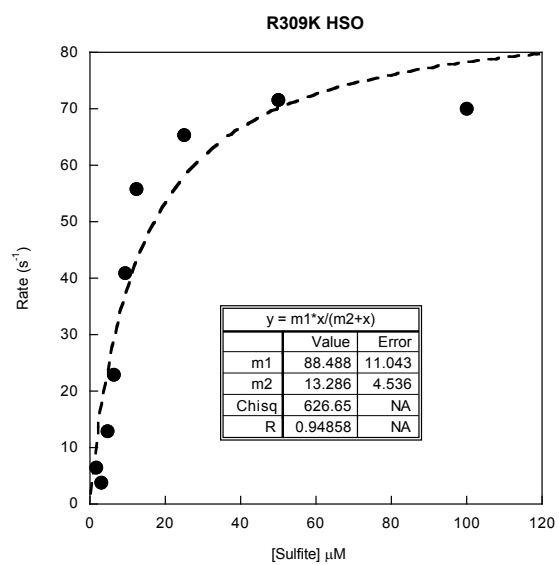

Supplement: c4mt00099d1.pdf [file c4mt00099d1.pdf]
